# Supplementary material
Source: HighWire-hosted journal article supplement (http://www.qdcxjkg.com/highwire/filestream/126962/field_highwire_adjunct_files/0/Supplementary_data.pdf)
Supplement: Supplementary_data.pdf [file Supplementary_data.pdf]

# Supplementary Data

## Technical information

### Acquisition of audiovisual recordings

|          | <b>Stethoscope</b>           | <b>Microphone</b>                  | <b>Camera</b>                |
|----------|------------------------------|------------------------------------|------------------------------|
| Athens   | Littman Master Classic II    | Audio Technica AT899               | Panasonic HC-X900            |
| Murcia   | Littman Master Classic II    | Sony ECM 77B/9X                    | CANON Legria HF S30          |
| Tromsø   | Littman Master Classic II    | Sennheiser MKE 2-EW/ EW 112-P G3-G | CANON Legria HF G10          |
| Winnipeg | Littman Master Classic II    | Audio Technica ATR 3350            | CANON Vixia (Legria) HF S200 |
| Zwolle   | Littman Classic II Pediatric | SONY ECM 77B                       | CANON Legria HF S30          |

Identical equipment had different names depending on geographic region, i.e. CANON Legria (Europe) is CANON Vixia (North America). Where the recording centres could not obtain identical microphones, alternatives with equal acoustical performance were used. The electret microphones were of similar dimensions to allow insertion into the stethoscope tubing. (An electret microphone is a type of electrostatic capacitor-based microphone which eliminates the need for a polarizing power supply by using a permanently charged material.)

### Details

Audiovisual (AV) files were recorded in high definition (1920 x 1080 full HD) to SDHC memory cards. Files were stored in MP4 format. The audio signal was extracted and saved separately (Adobe Audition CC, Adobe) as 48 kHz, 16 bit stereo recording in WAV file format. This file was converted (GoldWave®, Goldwave Inc., St. John's, NL, Canada) to a 10 kHz 16 bit mono file in WAV file format for use with RALEview, an open access program (Pixsoft Inc., Winnipeg, Canada) for acoustical analysis of respiratory sounds. Since airflow had not been simultaneously acquired with the audiovisual recording, the visual information was used to manually indicate inspiration and expiration phases in the RALEview program. The edited file was stored in that program's RAL file format and used to extract information in the frequency (Fast Fourier Transformation analysis) and time domain (Time Expanded Waveform analysis). The respective information was presented in screen captures of spectrograms and sound waveforms. Graphs of average

sound spectra (Origin<sup>®</sup>, OriginLab, Northhampton, MA, USA) were generated. A brief summary described the key features of the acoustical analysis.

## **Quality assurance and evaluation**

Questionnaire to determine inclusion of audiovisual recording (FluidSurveys, Ottawa, Canada)

# Reference Collection of Respiratory Sounds

Expert Panel

0%

## Assessment of audiovisual recordings

Recording 01\_ZN003

[https://www.dropbox.com/s/p40kmxk1wy78lr1/01\\_ZN003.wmv](https://www.dropbox.com/s/p40kmxk1wy78lr1/01_ZN003.wmv)

### Basic breath sounds

best described as

### Comments

Type here

### Adventitious sounds

|                      | inspiration              | expiration               |
|----------------------|--------------------------|--------------------------|
| Fine crackles        | <input type="checkbox"/> | <input type="checkbox"/> |
| Coarse crackles      | <input type="checkbox"/> | <input type="checkbox"/> |
| Rhonchi              | <input type="checkbox"/> | <input type="checkbox"/> |
| Low-pitched wheezes  | <input type="checkbox"/> | <input type="checkbox"/> |
| High-pitched wheezes | <input type="checkbox"/> | <input type="checkbox"/> |

Other sounds, e.g. stridor, squawk, friction rub etc.

Please specify in COMMENTS below

Yes

No

### Comments

Type here

Should this recording be added to the Reference Collection?

Yes

No

## Questionnaire to determine current nomenclature (FluidSurveys, Ottawa, Canada)

### Lung sound nomenclature

Terminology in the European languages  
English terms are based on Table 1 in Bohadana et al., N Engl J Med 2014;370:744-51.

*Please use the text boxes below each term to type in the respective words that are used in your language.*

Feel free to type the terms in the alphabet of your language but use English when you add further explanations and comments.

#### Normal lung sounds

#### Bronchial breathing

#### Stridor

#### Wheeze

#### Rhonchus

#### Fine crackle

#### Coarse crackle

#### Pleural friction rub

## Squawk

There is no term for SQUAWK in my language

Please indicate your country

### Problems with translation

Do you experience difficulties in translating terms from the English nomenclature on respiratory sounds to your language?

Yes  No

If "yes", please specify which terms

### Other terminology

Are there terms in your own language that are other than a direct equivalent of the English term?

Yes  No

If so, please explain

Do you think there is a need for a unified international nomenclature on respiratory sounds?

Yes  No

## Countries and languages

| Official languages | EU member states | Sovereign states       | Population  | Survey (replies) |
|--------------------|------------------|------------------------|-------------|------------------|
|                    |                  | Albania                | 3,020,209   | 1                |
|                    |                  | Andorra                | 85,458      |                  |
|                    |                  | Armenia                | 3,060,631   |                  |
| German             | Austria          | Austria                | 8,223,062   | 1                |
|                    |                  | Azerbaijan             | 9,686,210   |                  |
|                    |                  | Belarus                | 9,608,058   |                  |
| Dutch, French      | Belgium          | Belgium                | 10,449,361  | 4                |
|                    |                  | Bosnia and Herzegovina | 3,871,643   |                  |
| Bulgarian          | Bulgaria         | Bulgaria               | 6,924,716   | 2                |
| Croatian           | Croatia          | Croatia                | 4,470,534   | 2                |
| Greek, Turkish     | Cyprus           | Cyprus                 | 1,172,458   | 2                |
| Czech              | Czech Republic   | Czech Republic         | 10,627,448  | 2                |
| Danish             | Denmark          | Denmark                | 5,569,077   | 1                |
| Dutch              | Netherlands      | Netherlands            | 16,877,351  | 2                |
| English            | United Kingdom   | United Kingdom         | 63,742,977  | 2                |
| Estonian           | Estonia          | Estonia                | 1,257,921   | 1                |
| Finnish            | Finland          | Finland                | 5,268,799   | 1                |
| French             | France           | France                 | 66,259,012  | 4                |
|                    |                  | Georgia                | 4,935,880   |                  |
| German             | Germany          | Germany                | 80,996,685  | 2                |
| Greek              | Greece           | Greece                 | 10,775,557  | 2                |
| Hungarian          | Hungary          | Hungary                | 9,919,128   | 2                |
|                    |                  | Iceland                | 317,351     |                  |
| Irish              | Ireland          | Ireland                | 4,832,765   | 1                |
| Italian            | Italy            | Italy                  | 61,680,122  | 4                |
|                    |                  | Kazakhstan             | 17,948,816  |                  |
|                    |                  | (Kosovo)               | 1,836,529   |                  |
| Latvian            | Latvia           | Latvia                 | 2,165,165   | 2                |
|                    |                  | Liechtenstein          | 37,313      |                  |
| Lithuanian         | Lithuania        | Lithuania              | 3,505,738   | 1                |
| French, German     | Luxembourg       | Luxembourg             | 549,680     |                  |
| Maltese            | Malta            | Malta                  | 412,655     |                  |
|                    |                  | Macedonia              | 2,091,719   |                  |
|                    |                  | Moldova                | 3,583,288   |                  |
|                    |                  | Monaco                 | 30,508      |                  |
|                    |                  | Montenegro             | 650,036     |                  |
|                    |                  | Norway                 | 5,147,792   | 2                |
| Polish             | Poland           | Poland                 | 38,346,279  | 1                |
| Portuguese         | Portugal         | Portugal               | 10,813,834  | 2                |
| Romanian           | Romania          | Romania                | 21,729,871  | 2                |
|                    |                  | Russia                 | 142,470,272 | 2                |
|                    |                  | San Marino             | 32,742      |                  |
|                    |                  | Serbia                 | 7,209,764   | 2                |

|           |          |             |            |   |
|-----------|----------|-------------|------------|---|
| Slovak    | Slovakia | Slovakia    | 5,443,583  | 1 |
| Slovenian | Slovenia | Slovenia    | 1,988,292  | 2 |
| Spanish   | Spain    | Spain       | 47,737,941 | 4 |
| Swedish   | Sweden   | Sweden      | 9,723,809  | 2 |
|           |          | Switzerland | 8,061,516  | 2 |
|           |          | Turkey      | 76,667,864 | 2 |
|           |          | Ukraine     | 44,291,413 | 2 |

**Sources of information:**

European official languages

[http://ec.europa.eu/languages/policy/linguistic-diversity/official-languages-eu\\_en.htm](http://ec.europa.eu/languages/policy/linguistic-diversity/official-languages-eu_en.htm)

Sovereign states in Europe

[http://en.wikipedia.org/wiki/List\\_of\\_sovereign\\_states\\_and\\_dependent\\_territories\\_in\\_Europe#States\\_with\\_limited\\_recognition](http://en.wikipedia.org/wiki/List_of_sovereign_states_and_dependent_territories_in_Europe#States_with_limited_recognition)

Transliteration (non-Latin to romanized text)

<http://www.ushuaia.pl/transliterate/?ln=en>

# Responses to survey on lung sound nomenclature

## Normal (basic) sounds and bronchial breathing

|             | Language   | Normal lung sound                                                   | Bronchial breathing                           |
|-------------|------------|---------------------------------------------------------------------|-----------------------------------------------|
| Albania     | Albanian   | Respiracion vesikular                                               | Respiracion bronkial                          |
| Austria     | German     | Vesikuläres Atemgeräusch                                            | Bronchialatmen                                |
| Belgium     | Dutch      | Normaal vesiculair ademgeruis, normale longgeluiden                 | Bronchiaal ademgeruis (ademen)                |
|             | French     | Bruits respiratoires normaux                                        | Bruit respiratoire bronchique                 |
| Bulgaria    | Bulgarian  | чисто везикуларно дишане, везикуларно дишане                        | бронхиално дишане                             |
| Croatia     | Croatian   | Normalan plućni zvuk, normalni šum disanja                          | Bronhalno disanje, bronhalni šum disanja      |
| Cyprus      | Greek      | Αναπνευστικό ψιθύρισμα, φυσιολογικό αναπνευστικό ψιθύρισμα          | Σωληνώδες φύσημα, βρογχικού τύπου αναπνοή     |
|             | Turkish    | Veziküler ses                                                       | Bronşiyal solunum                             |
| Czech Rep   | Czech      | Skřípkové dýchání                                                   | Trubicové dýchání                             |
| Denmark     | Danish     | Normal lunge lyd                                                    | Bronchial vejtrækning                         |
| Estonia     | Estonian   | Vesikulaarne hingamiskahin                                          | Bronhiaalne (kare) hingamiskahin              |
| Finland     | Finnish    | Normaali hengityssäni                                               | Bronkiaalinen hengityssäni                    |
| France      | French     | Murmure vésiculaire, bruits auscultatoires normaux                  | Souffle tubaire, bruits bronchiques           |
| FYROM       | Macedonian | нормални белодробни звуци                                           | Бронхијално дишење                            |
| Germany     | German     | Normale Atemgeräusche, seitengleiches Atemgeräusch                  | Bronchiales Atemgeräusch                      |
| Greece      | Greek      | Φυσιολογικοί αναπνευστικοί ήχοι, φυσιολογικό αναπνευστικό ψιθύρισμα | Βρογχική αναπνοή                              |
| Hungary     | Hungarian  | Normál légzési hangok, puha, sejtes alaplégzés                      | Hörgi légzés                                  |
| Ireland     | English    | Normal breath sounds                                                | Bronchial breathing                           |
| Italy       | Italian    | Murmure vescicolare normale                                         | Respiro bronchiale                            |
| Latvia      | Latvian    | Normāla plaušu skaņa, vezikulāra elpošana                           | Bronhiāla elpošana                            |
| Lithuania   | Lithuanian | Normalus plaučių garsas, vezikulinis alsavimas                      | Bronchinis alsavimas                          |
| Netherlands | Dutch      | Normaal ademgeruis, vesiculair ademgeruis                           | Bronchiaal ademgeruis                         |
| Norway      | Norwegian  | Normale lungelyder, vesikulær respirasjonslyd                       | Bronkial respirasjonslyd, bronkial blåst      |
| Poland      | Polish     | Szmer pęcherzykowy prawidłowy                                       | Szmer oskrzelowy                              |
| Portugal    | Portugal   | Murmúrio vesicular, sons respiratórios                              | Ruído brônquico, sons respiratórios           |
| Romania     | Romanian   | Sunete pulmonare normale, auscultatie normala                       | Suflu tubar, bronhofonie                      |
| Russia      | Russian    | нормальный легочный звук, Нормальное везикулярное дыхание           | Бронхиальное дыхание                          |
| Serbia      | Serbian    | Normalan disajni šum                                                | Bronhijalno disanje                           |
| Slovakia    | Slovakian  | Fyziologický (normálny) posluchový nález, vezikulárne dýchanie      | Bronchálne dýchanie                           |
| Slovenia    | Slovenian  | Normalni dihalni šum                                                | Bronhialno dihanje                            |
| Spain       | Spanish    | Murmullo vesicular, ruidos o sonidos respiratorios normales         | Soplo tubárico, respiración bronquial         |
| Sweden      | Swedish    | Vesikulärt andningsljud, normala andningsljud                       | Bronkiella andningsljud, bronkialandning      |
| Switzerland | German     | Vesikuläres atemgeräusch, normales atemgeräusch                     | Bronchialatmung, bronchialatmen               |
| Turkey      | Turkish    | Normal akciğer sesleri, veziküler ses                               | Bronşiyal solunum, tuberi sufl, bronsiyal ses |
| Ukraine     | Ukrainian  | Нормальний легеневий подих, Везикулярне дихання                     | Бронхіальне дихання                           |



## Continuous sounds

|             | <b>Language</b> | <b>Stridor</b>                     | <b>Wheeze</b>                                                 | <b>Rhonchus</b>                           |
|-------------|-----------------|------------------------------------|---------------------------------------------------------------|-------------------------------------------|
| Albania     | Albanian        | Stridor                            | Weezing                                                       | Rale                                      |
| Austria     | German          | Stridor                            | Giemen                                                        |                                           |
| Belgium     | Dutch           | Stridor                            | Wheezing                                                      | Ronchus                                   |
|             | French          | Stridor                            | Sibilance                                                     | Rhonhus                                   |
| Bulgaria    | Bulgarian       | стридор                            | свиркане, свиркаци сухи хрипове                               | хъркаци сухи хрипове                      |
| Croatia     | Croatian        | Stridor                            | Zvižduci, fijuk, fićuk,                                       | Нгорас, krupni hgoraci                    |
| Cyprus      | Greek           | Σιγμός, εισπνευστικός συριγμός     | Συριγμός                                                      | Ρόγχος                                    |
|             | Turkish         | Stridor                            | Wheezing                                                      | Ronküs                                    |
| Czech Rep   | Czech           | Stridor                            | Pískot(y)                                                     | Vrzot(y)                                  |
| Denmark     | Danish          | Stridor                            | Hvæsen                                                        | Ronchi                                    |
| Estonia     | Estonian        | Stridor                            | Vilistav (vilinatega) hingamine                               | Kuivad räginad, jurinad                   |
| Finland     | Finnish         | Sisäänhengityksen vinkuna, stridor | Uloshengityksen vinkuna                                       | Limarahina (rohina)                       |
| France      | French          | Stridor                            | Sibilant, sifflement                                          | Râle bronchique, ronchi                   |
| FYROM       | Macedonian      | Стридор                            | визинг, Пискава хркулка                                       | кркори, Стругава хркулка                  |
| Germany     | German          | Stridor                            | Juchzen, giemen, pfeifen                                      | Brummen                                   |
| Greece      | Greek           | Σιγμός, εισπνευστικός συριγμός     | Συριγμός, συρίττοντες                                         | Ρόγχοι                                    |
| Hungary     | Hungarian       | Stridor                            | Zihálál, nehézlégzés                                          | Szörtyözörej, sípolás, búgás              |
| Ireland     | English         | Stridor                            | Wheeze                                                        | Rhonhus                                   |
| Italy       | Italian         | Stridore                           | Sibili, fischio                                               | Ronco                                     |
| Latvia      | Latvian         | Stridors                           | Sēkšana, čikstoša elpošana, svilpjoša elpošana                | Rupjš sauss troksnis                      |
| Lithuania   | Lithuanian      | Stridoras                          | Sausi švilpianrys karkalai                                    | Sausi birzgiantys karkalai                |
| Netherlands | Dutch           | Stridor                            | Piepende ademhaling, hoogfrequente rhonchi, fluitende rhonchi | Ronchi                                    |
| Norway      | Norwegian       | Stridor, ilnspiratorisk hvesing    | Piping                                                        | Rhoncus, lavfrekvent knatrelyd, pipelyder |
| Poland      | Polish          | Stridor                            | Świsty                                                        | Rzężenia                                  |
| Portugal    | Portugal        | Estridor                           | Sibilos                                                       | Roncos                                    |
| Romania     | Romanian        | Stridor                            | Wheezing                                                      | Ronflante, ronhusuri                      |
| Russia      | Russian         | Стридор                            | Свистящие хрипы                                               | Хрипы                                     |
| Serbia      | Serbian         | Stridor                            | Zviždanje                                                     | Krkor                                     |
| Slovakia    | Slovakian       | Stridor, stridorózne dýchanie      | Hvízdanie, pískanie                                           | Chrôpky                                   |
| Slovenia    | Slovenian       | Stridor                            | Piskanje, piski                                               | Hropenje, grobi piski                     |
| Spain       | Spanish         | Estridor                           | Sibilancias                                                   | Roncus                                    |
| Sweden      | Swedish         | Stridor, stridorösa andningsljud   | Pipigoch väsande andning, pipande eller väsande andning       | Ronki                                     |
| Switzerland | German          | Stridor                            | Giemen, pfeifendes atemgeräusch                               | Ronchi, rasselgeräusch                    |
| Turkey      | Turkish         | Stridor, Hırıltı                   | Wheeze, sibilan ral, hışıltı, hırıltı, vizing                 | Ronkus                                    |
| Ukraine     | Ukrainian       | Свистяче дихання, стридорозне      | Свистяче дихання, ядуга                                       | Хрип                                      |

## Discontinuous and other sounds

|             | <b>Language</b> | <b>Fine crackle</b>                                             | <b>Coarse crackle</b>                                       | <b>Pleural friction rub</b>                 | <b>Squawk</b>            |
|-------------|-----------------|-----------------------------------------------------------------|-------------------------------------------------------------|---------------------------------------------|--------------------------|
| Albania     | Albanian        | Krepitacione fine                                               | Krepitacione te ashpra                                      | Ferkime pleurale                            |                          |
| Austria     | German          | Feinblasige RG                                                  | Mittel bis grobblasige RG                                   | Pleurareiben                                |                          |
| Belgium     | Dutch           | Fijne crepitatie, velcro crepitaties                            | Grove crepitatie, grofblazige crepitaties                   | Pleuraal wrijfgeruis                        |                          |
|             | French          | Crépitements fins, craquement de haute fréquence                | Crépitements graves, craquement de basse fréquence          | Frottement pleural                          |                          |
| Bulgaria    | Bulgarian       | дребни влажни хрипове                                           | свиркане, свиркащи сухи хрипове                             | плеврално триене                            | крепитации, шумно дишане |
| Croatia     | Croatian        | Krepitacije, Fina krepitacija                                   | Gruba krepitacija, hropci                                   | Pleuralno trenje                            |                          |
| Cyprus      | Greek           | Λεπτοί τρίζοντες                                                | Παχείς τρίζοντες                                            | Ήχος τριβής υπεζωκότα                       |                          |
|             | Turkish         | Ince ral                                                        | Kaba ral                                                    | Frotman                                     |                          |
| Czech Rep   | Czech           | Chrůpk(y)                                                       | Chrop(y)                                                    | Pleurální třecí šelest                      |                          |
| Denmark     | Danish          | Fin knitren                                                     | Grov knitren                                                | Pleural gnidningslyd                        |                          |
| Estonia     | Estonian        | Peenemullilised räginad (krepitatsioonid)                       | Suuremullilised räginad                                     | Pleura hõõrdumiskahin                       |                          |
| Finland     | Finnish         | Hienojakoinen rahina                                            | Karkeajakoinen rahina                                       | Pleuran hankausääni                         |                          |
| France      | French          | Crépitants fins                                                 | Gros crépitants                                             | Frottement pleural                          | Squeak                   |
| FYROM       | Macedonian      | Нежен пукот, фини пукања (влажни шушњеви)                       | груби пукања                                                | плеврална линија                            |                          |
| Germany     | German          | Feinblasige Atemgeräusche                                       | Grobblasige Rasselgeräusche, grobblasige Atemgeräusche      | Pleurales Reiben                            |                          |
| Greece      | Greek           | Λεπτοί τρίζοντες                                                | Παχείς (αδρόι) τρίζοντες                                    | Πλευριτική τριβή, ήχος πλευριτικής τριβής   | Κρώξιμο                  |
| Hungary     | Hungarian       | Finom ropogás, apró hólyagú szörtyözrej                         | Durva ropogás, vegyes (közepes és nagy) hólyagú szörtyözrej | Pleurális dörrszörej                        | Durva zörej              |
| Ireland     | English         | Fine crackle                                                    | Coarse crackle                                              | Pleural friction rub                        | Squeak                   |
| Italy       | Italian         | Rantoli fini, crepitii fini                                     | Rantoli grossolani, crepitii grossolani                     | Sfregamento pleurico                        | Gemiti                   |
| Latvia      | Latvian         | Smalka krepitācija, sīks mitrs troksnis                         | Rupja krepitācija, rupjš mitrs troksnis                     | Pleiras berzes troksnis                     |                          |
| Lithuania   | Lithuanian      | Smulkūs drėgni karkalai                                         | Stambūs drėgni karkalai                                     | Pleuros trynimosi užesys                    |                          |
| Netherlands | Dutch           | Fijne crepetaties                                               | Grove crepetaties                                           | Pleurawrijven                               | Squawk, squeek           |
| Norway      | Norwegian       | Fine knatrelyder                                                | Grove knatrelyder, blærer                                   | Pleural gnidningslyd, gnidningslyd          | Bronkial blåst           |
| Poland      | Polish          | Trzeszczenia drobne                                             | Trzeszczenia grube                                          | Tarcie opłucnej                             |                          |
| Portugal    | Portugal        | Crepitações finas, ferveores finos,                             | Crepitações grossas, ferveores grosseiros                   | Atrito pleural                              |                          |
| Romania     | Romanian        | Crepitante fine, raluri crepitante                              | Crepitante, raluri subcrepitante                            | Frecatura pleurala                          |                          |
| Russia      | Russian         | сухие хрипы, мелкопузырчатые влажные хрипы                      | влажные хрипы, грубые (группопузырчатые) влажгын хрипы      | шум трения плевры                           |                          |
| Serbia      | Serbian         | Kasnoinspirijumski pukoti                                       | Ranoinspirijumski pukoti                                    | Pleuralno trenje                            |                          |
| Slovakia    | Slovakian       | Jemné praskanie, jemný krepitus                                 | Drsné praskanie, drsný krepitus                             | Pleurálny trecí šelest                      |                          |
| Slovenia    | Slovenian       | Fino pokanje, drobni poki                                       | Grobo pokanje, grobi poki                                   | Pleuralno trenje                            |                          |
| Spain       | Spanish         | Crepitantes finos, crepitantes de fina burbuja, pequeña burbuja | Crepitantes gruesos, crepitantes de gruesa burbuja          | Roce pleural                                |                          |
| Sweden      | Swedish         | Fina krepitationer                                              | Grova rassel, grova krepitationer                           | Pleurala gnidningsljud, gnidningsljud       |                          |
| Switzerland | German          | Feinblasiges Knisterrasseln, feinblasiges Rasselgeräusch        | Feuchtes rasselgeräusch, grobblasiges rasselgeräusch        | Pleurareiben                                | Quäken kreischen         |
| Turkey      | Turkish         | Ral, krepitasyon, ince ral                                      | Kaba ral                                                    | Plevral sürtünme sesi, plevral friction rub |                          |
| Ukraine     | Ukrainian       | Дрібнопузирчастий хрип                                          | Крупнопузирчастий хрип                                      | Шум тертя плеври                            | Клекотіння               |
